# Supplementary material for: First total synthesis of murisolinElectronic Supplementary Information (ESI) available: characterization data of synthetic murisolin (1), and 1H and 13C NMR spectra of compounds 9, 12 and 1. See http://www.rsc.org/suppdata/cc/b3/b312362f/
Source: Royal Society of Chemistry journal article supplement (doi:10.1039/b312362f), 2004-01-01

## Supplementary data

Electronic Supplementary Information for *Chem. Commun.*

### First total synthesis of murisolin

Naoyoshi Maezaki, Hiroaki Tominaga, Naoto Kojima, Minori Yanai,

Daisuke Urabe and Tetsuaki Tanaka\*

*Graduate School of Pharmaceutical Sciences, Osaka University,*

*1-6 Yamadaoka, Suita, Osaka 565-0871, Japan.*

**General:** Melting points are uncorrected. Optical rotations were measured using a JASCO DIP-360 digital polarimeter.  $^1\text{H}$  NMR spectra were recorded in  $\text{CDCl}_3$  solution with a JEOL JNM-GX500 spectrometer (500 MHz).  $^{13}\text{C}$  NMR spectra were recorded in  $\text{CDCl}_3$  solution with a JEOL JNM-AL300 spectrometer (75 MHz). All signals are expressed as ppm downfield from tetramethylsilane used as an internal standard ( $\delta$  value). The following abbreviations are used: singlet (s), doublet (d), triplet (t), quartet (q), multiplet (m). IR absorption spectra (FT: diffuse reflectance spectroscopy) were recorded with KBr powder with a Horiba FT-210 IR spectrometer, and only noteworthy absorptions ( $\text{cm}^{-1}$ ) are listed. Mass spectra were obtained with a JEOL JMS-600H and a JEOL JMS-700 mass spectrometer.

Murisolin (**1**): mp 72.5–73.5 °C;  $[\alpha]^{23}_{\text{D}} +20.7$  (*c* 0.39, MeOH),  $[\alpha]^{22}_{\text{D}} +21.5$  (*c* 0.36,  $\text{CHCl}_3$ ); IR (KBr): 3435, 3419, 2916, 2848, 1751, 1470, 1319, 1201, 1119, 1074, 1028, 960, 847, 721  $\text{cm}^{-1}$ ;  $^1\text{H}$  NMR (500 MHz,  $\text{CDCl}_3$ )  $\delta$  0.88 (t, 3H,  $J = 7.0$  Hz), 1.25–1.57 (m, 42H), 1.44 (d, 3H,  $J = 6.7$  Hz), 1.63–1.71 (m, 2H), 1.94–2.02 (m, 2H), 2.40 (dd, 1H,  $J = 15.3, 8.6$  Hz), 2.47–2.58 (m, 3H), 2.51–2.55 (m, 1H), 3.41 (td, 2H,  $J = 6.7, 4.9$  Hz), 3.80 (q, 2H,  $J = 6.7$  Hz), 3.82–3.87 (m, 1H), 5.07 (qd, 1H,  $J = 6.7, 1.2$  Hz), 7.20 (d, 1H,  $J = 1.2$  Hz);  $^{13}\text{C}$  NMR (75 MHz,  $\text{CDCl}_3$ )  $\delta$  14.1, 19.1, 22.7, 25.5 (2C), 25.6, 28.7 (2C), 29.3, 29.4, 29.5 (4C), 29.57, 29.62 (4C), 29.65, 29.69, 31.9, 33.3, 33.4 (2C), 37.4, 70.0, 74.0 (2C), 78.0, 82.6 (2C), 131.2, 151.8, 174.6; MS (FAB):  $m/z$ : 581.5 ( $[\text{M}+\text{H}]^+$ ). HRMS (FAB): calcd for  $\text{C}_{35}\text{H}_{65}\text{O}_6$  ( $[\text{M}+\text{H}]^+$ ): 581.4781. Found: 581.4786.



alkyne 4.0 eq. -NME less polar

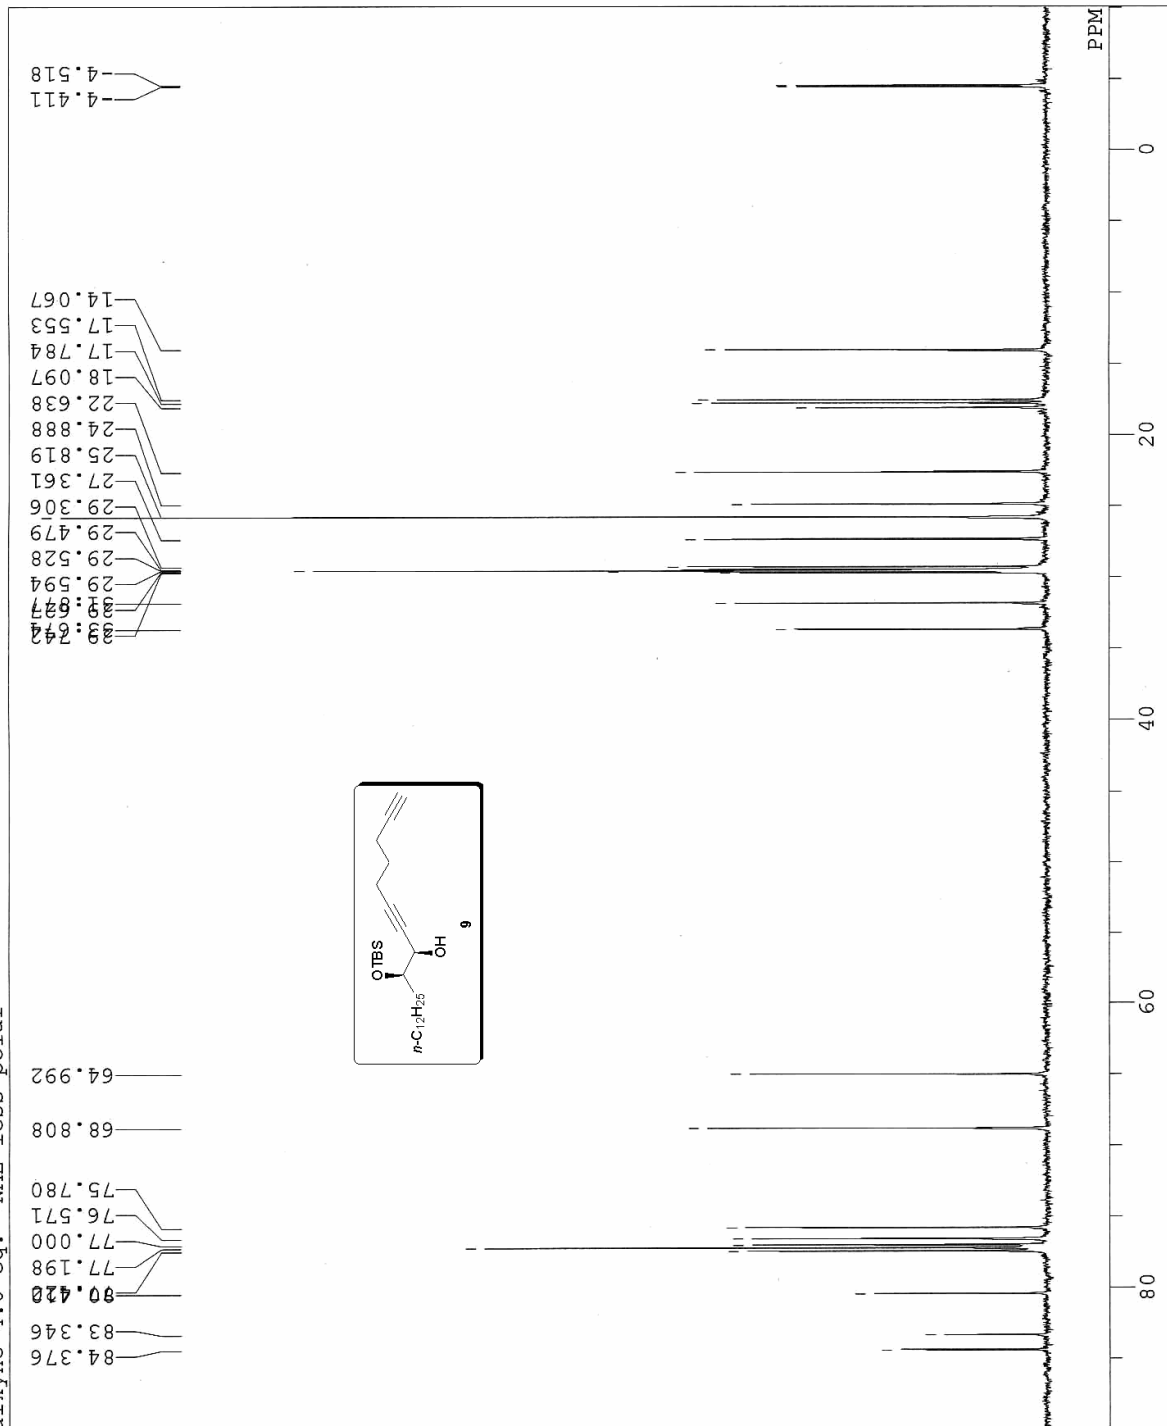

DFILE F:\MONO-ALKYNYL CO  
COMNT alkyne 4.0 eq. -NM  
DATIM Mon Dec 16 12:06:1  
OBNUC 13C  
EXMOD BCM  
OBFRQ 75.45 MHz  
OBSET 124.00 KHz  
OBFIN 1840.0 Hz  
POINT 32768  
FREQU 20408.1 Hz  
SCANS 500  
ACQTM 1.606 sec  
PD 1.394 sec  
PW1 4.3 us  
IRNUC 1H  
CTEMP 23.7 c  
SIVNT CDCL3  
EXREF 77.00 ppm  
BF 1.20 Hz  
RGAIN 25

1H Line

Date : Mon Jun 2 10:34:10 2003  
FileName : .LoadingFID.nmdata  
Comment : 1H Line  
SliceHistory :  
EXMODE : non  
POINT : 16384 points  
SAMPO : 16384 points  
FREQU : 10000.0 Hz  
FILTR : 5000 Hz  
DELAY : 40.0 usec  
DEADT : 58.7 usec  
INVTL : 100.0 usec  
TIMES : 16 times  
DUMMY : 1 times  
PD : 5.3616 sec  
ACQTM : 1638.3999 msec  
PREDL : 0.01000 msec  
IN1WT : 1000.0000 msec  
RESOL : 0.61 Hz  
PW1 : 2.63 usec  
1H :  
OBNUC : 500.00 MHz  
OBFRQ : 162167.63 Hz  
OBSET : 23  
RGAIN :  
SCANS : 16 times  
SLVNT : CDCL3  
SPINNING : 14 Hz  
TEMP : 26.6 C

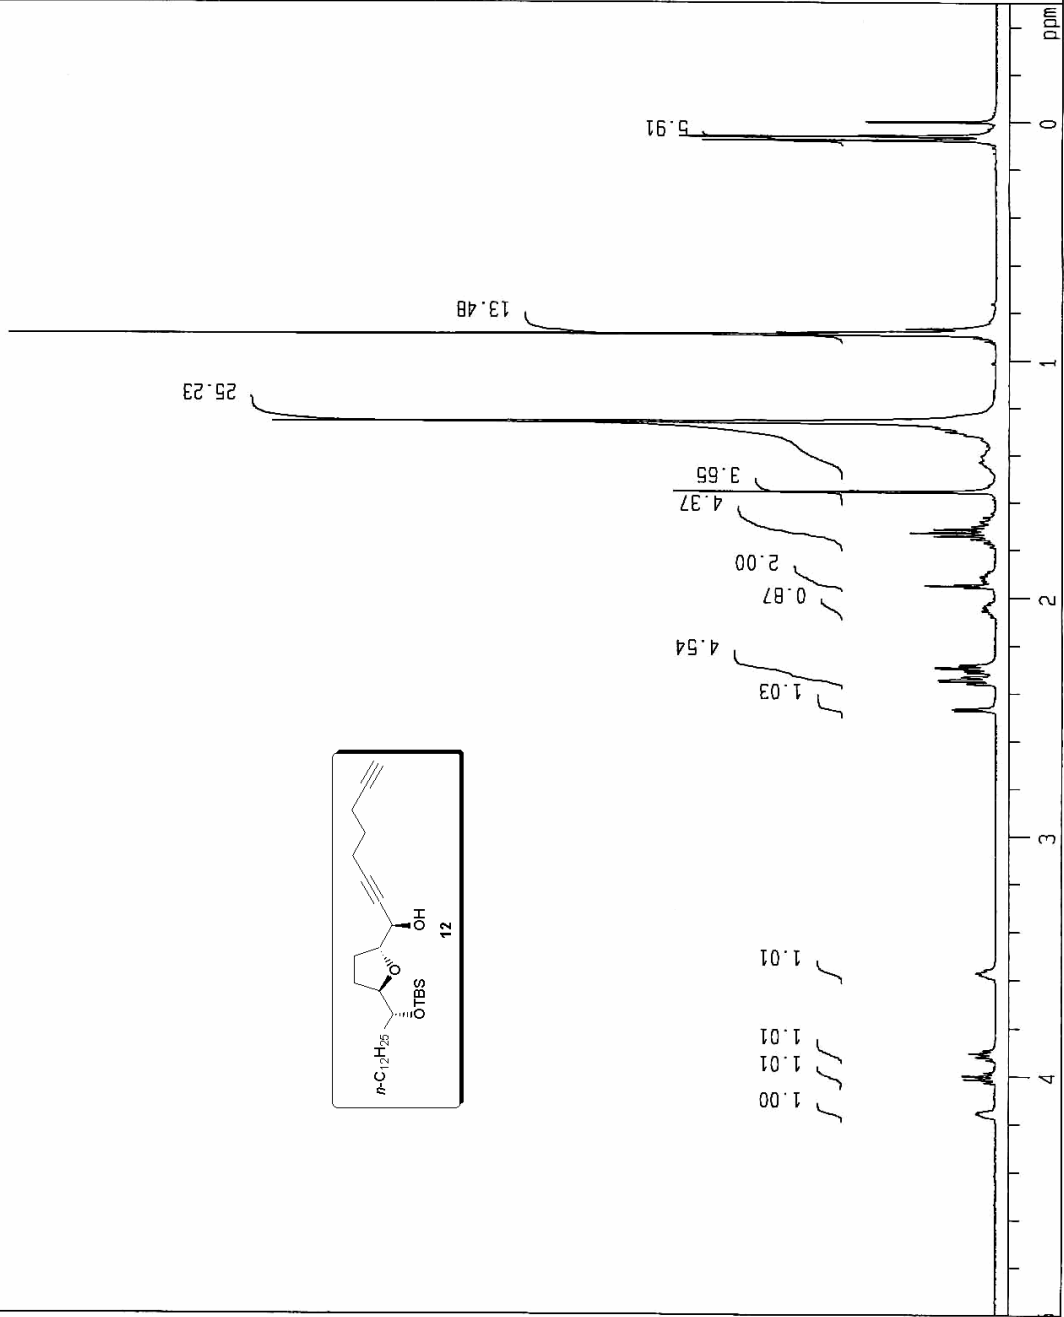

HT-255 mono-alkynyl compound

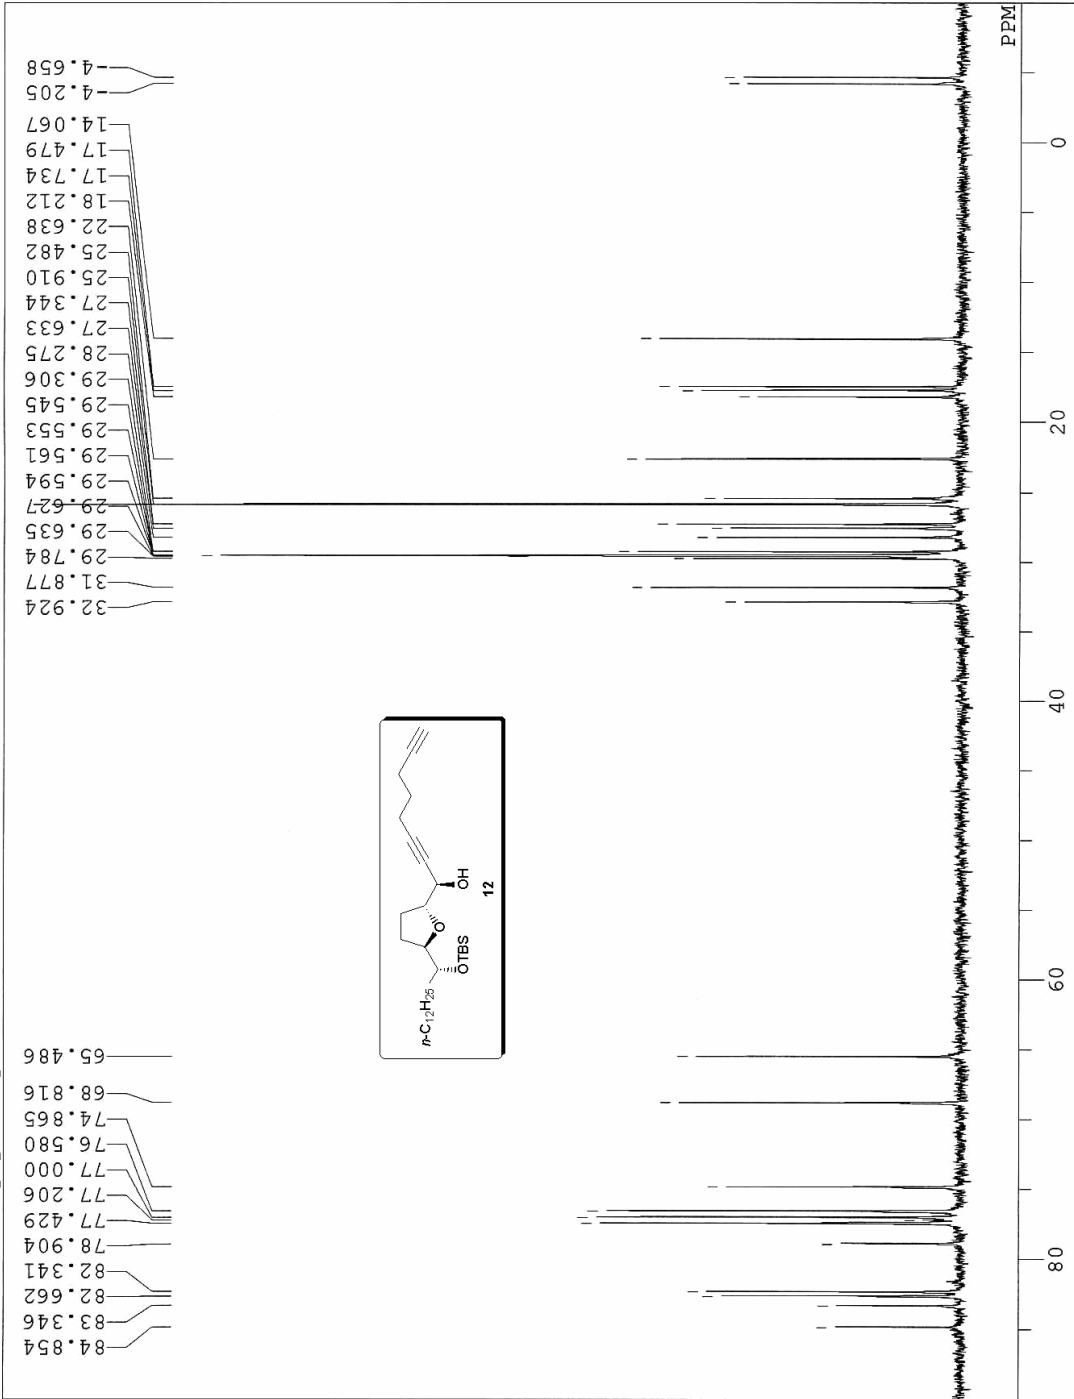

DFILE F:\HT-255 THF-ALDEHY.  
 COMNT HT-255 mono-alkynyl  
 DATIM Mon Jun 09 11:52:41  
 ORNUC 13C  
 EXMOD BCM  
 OBFRO 75.45 MHz  
 OBSET 124.00 KHz  
 OBFIN 1840.0 Hz  
 POINT 32768  
 FREQU 20408.1 Hz  
 SCANS 300  
 ACQTM 1.606 sec  
 PD 1.394 sec  
 PWL 4.3 us  
 IRNUC 1H  
 CTEMP 23.9 c  
 SLVNT CDCL3  
 EXREF 77.00 ppm  
 BF 1.20 Hz  
 RGAIN 24

1H Line

Date : Fri Jun 27 21:00:53 2003  
File Name : .Loading\FID.nmdata  
Comment : 1H Line  
Slice History : non  
EXMODE : non  
POINT : 16384 points  
SAMPD : 16384 points  
FREQU : 100000.0 Hz  
FILTIR : 5000 Hz  
DELAY : 40.0 usec  
DEADT : 58.7 usec  
INTEVL : 100.0 usec  
TIMES : 16 times  
DUMMY : 1 times  
PR : 5.3616 SEC  
ACQTM : 1638.3999 msec  
PREDL : 0.01000 msec  
INVTM : 1000.0000 msec  
RESOL : 0.61 Hz  
PMT : 1H 500.00 MHz  
ORNUC : 162167.63 Hz  
ORSET : 17  
SCANS : 15 times  
SLVNT : CDCL3  
SPINNING : 14 Hz  
TEMP : 14.0 C

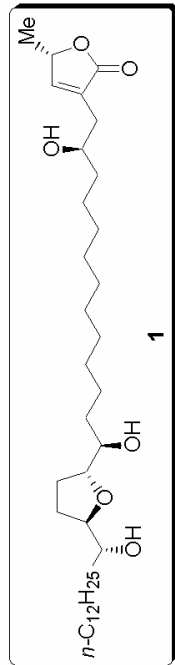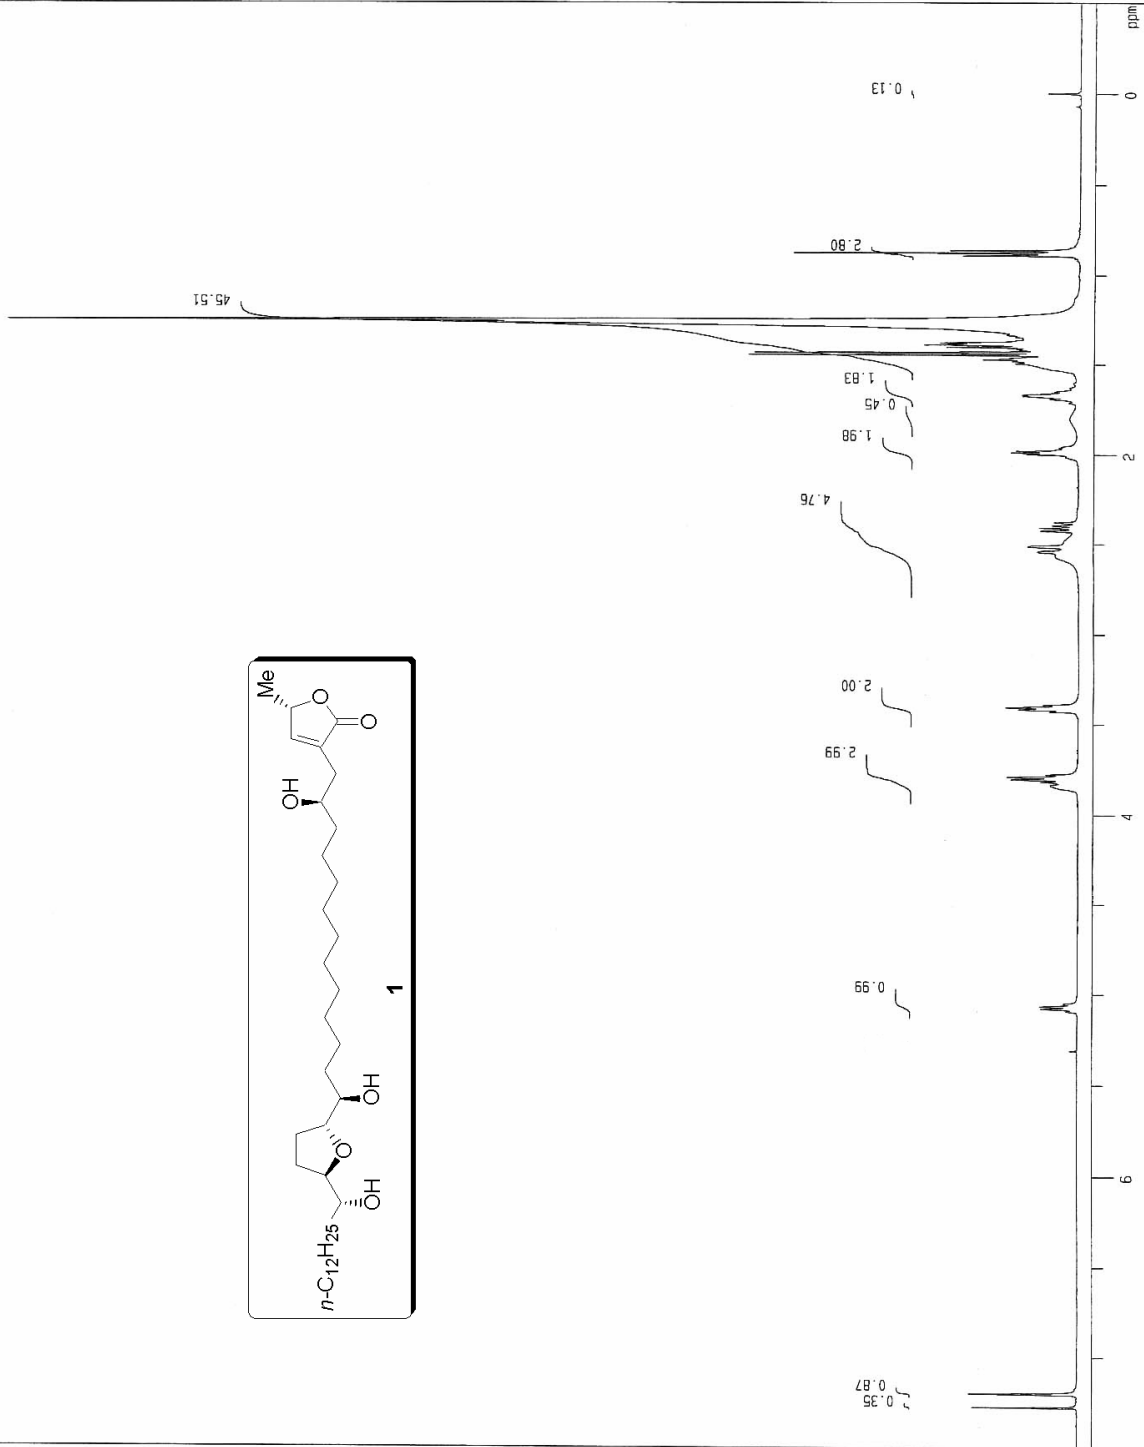

HT-266 murisolin

F:\HT-266 MURISOLIN\  
HT-266 murisolin  
Sat Jun 28 04:31:55  
13C  
EXMOD BCM

OBFRO 75.45 MHz  
OBSET 124.00 KHz  
OBFIN 1840.0 Hz  
POINT 32768  
FREQU 20408.1 Hz  
SCANS 5000  
ACQTM 1.606 sec  
PD 1.394 sec  
PWL 4.3 us  
IRNUC 1H  
CTEMP 21.4 c  
SLVNT CDCL3  
EXREF 77.00 ppm  
BF 1.20 Hz  
RGAIN 24

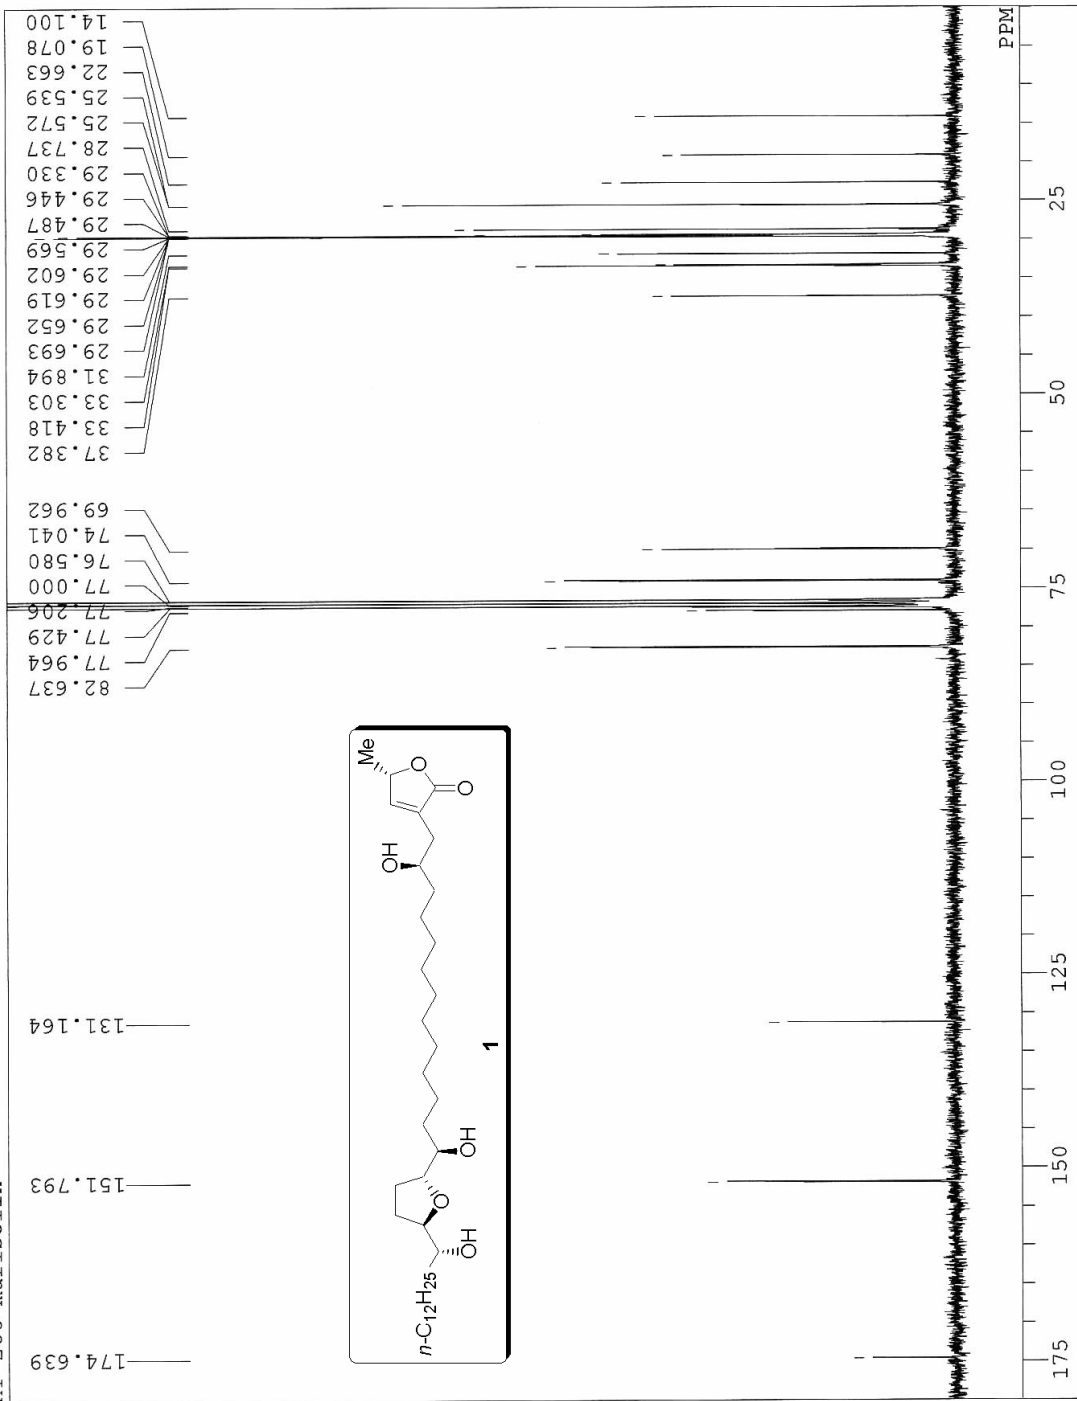

Supplement: b312362f.pdf [file b312362f.pdf]
